# Supplementary material
Source: publisher figshare collection journal article supplement (https://sage.figshare.com/ndownloader/files/21240516)
Supplement: Supplementary file 1 [file 21240516]

- ❖ Plastic hinges for connections and members should be modeled simultaneously in the progressive collapse analysis.
- ❖ By modeling the connection plastic hinges, the capacity of structure decreases against the progressive collapse.
- ❖ By considering the beam-to-column connection characteristics, the calculated dynamic increase factor has a larger value than the corresponding value calculated for the beams.
- ❖ The Freeflange connection with over-strength of 30% has the best performance, while the Bottom haunch in WUF without slab connection has the worst behavior.
